# Supplementary material for: Predictors of Hospitalization of Individuals With First-Episode Psychosis: Data From a 2-Year Follow-Up of the RAISE-ETP
Source: Atypon-hosted journal article supplement (doi:10.1176/appi.ps.201800511), 2019-05-14
Supplement: appi.ps.201800511.ds001.pdf [file appi.ps.201800511.ds001.pdf]

Supplemental Table 1. Demographic and Baseline Clinical Characteristics of Participants with One or More Post Baseline Assessments

| Categorical Variables                      | Never hospitalized During<br>Follow-up, N=270 |      | Hospitalized During<br>Follow-up, N=112 |      |
|--------------------------------------------|-----------------------------------------------|------|-----------------------------------------|------|
|                                            | N                                             | %    | N                                       | %    |
| Duration of Untreated Psychosis > 74 weeks | 128                                           | 47.4 | 64                                      | 57.1 |
| Male sex                                   | 201                                           | 74.4 | 78                                      | 69.6 |
| Race                                       |                                               |      |                                         |      |
| White                                      | 144                                           | 53.3 | 62                                      | 55.4 |
| African American                           | 103                                           | 38.2 | 40                                      | 35.7 |
| Other                                      | 23                                            | 8.5  | 10                                      | 8.9  |
| Hispanic ethnicity                         | 52                                            | 19.3 | 19                                      | 17   |
| Marital status                             |                                               |      |                                         |      |
| Presently married                          | 16                                            | 5.9  | 7                                       | 6.2  |
| Widowed/divorced/separated                 | 16                                            | 5.9  | 4                                       | 3.6  |
| Never married                              | 238                                           | 88.2 | 101                                     | 90.2 |
| Current residence                          |                                               |      |                                         |      |
| Independent living                         | 46                                            | 17   | 24                                      | 21.4 |
| Supported or structured                    | 8                                             | 3    | 3                                       | 2.7  |
| Family, parents, grandparents, sibling     | 197                                           | 73   | 75                                      | 67   |
| Homeless, shelter, or other                | 19                                            | 7    | 10                                      | 8.9  |
| Patient's education                        |                                               |      |                                         |      |
| Some college or higher                     | 86                                            | 31.9 | 33                                      | 29.5 |
| Completed high school                      | 82                                            | 30.4 | 38                                      | 33.9 |
| Some high school                           | 87                                            | 32.2 | 35                                      | 31.2 |
| Some or completed grade school             | 15                                            | 5.6  | 6                                       | 5.4  |
| Mother's education                         |                                               |      |                                         |      |
| Some college or higher                     | 113                                           | 41.9 | 49                                      | 43.8 |
| Completed high school                      | 74                                            | 27.4 | 28                                      | 25   |
| Some high school or grade school           | 45                                            | 16.7 | 11                                      | 9.8  |
| No school or unknown                       | 38                                            | 14.1 | 24                                      | 21.4 |
| Current student                            | 58                                            | 21.6 | 18                                      | 16.1 |
| Currently working                          | 45                                            | 16.8 | 11                                      | 9.8  |

|                                                                              | Never hospitalized During<br>Follow-up, N=270 |      | Hospitalized During<br>Follow-up, N=112 |      |
|------------------------------------------------------------------------------|-----------------------------------------------|------|-----------------------------------------|------|
|                                                                              |                                               |      |                                         |      |
| Student or working                                                           | 90                                            | 33.6 | 28                                      | 25   |
| Type of insurance                                                            |                                               |      |                                         |      |
| Private                                                                      | 53                                            | 19.8 | 28                                      | 25   |
| Public                                                                       | 84                                            | 31.3 | 36                                      | 32.1 |
| Uninsured                                                                    | 131                                           | 48.9 | 47                                      | 42   |
| SCID diagnoses                                                               |                                               |      |                                         |      |
| Schizophrenia                                                                | 138                                           | 51.1 | 65                                      | 58   |
| Schizoaffective bipolar                                                      | 15                                            | 5.6  | 8                                       | 7.1  |
| Schizoaffective depressive                                                   | 40                                            | 14.8 | 14                                      | 12.5 |
| Schizophreniform provisional or definite                                     | 50                                            | 18.5 | 14                                      | 12.5 |
| Brief psychotic disorder or psychotic disorder NOS                           | 27                                            | 10   | 11                                      | 9.8  |
| Lifetime alcohol use disorder                                                |                                               |      |                                         |      |
| Did not meet criteria                                                        | 175                                           | 64.8 | 68                                      | 60.7 |
| Met abuse criteria                                                           | 37                                            | 13.7 | 10                                      | 8.9  |
| Met dependence criteria                                                      | 58                                            | 21.5 | 34                                      | 30.4 |
| Lifetime cannabis use disorder                                               |                                               |      |                                         |      |
| Did not meet criteria                                                        | 183                                           | 67.8 | 68                                      | 60.7 |
| Met abuse criteria                                                           | 36                                            | 13.3 | 16                                      | 14.3 |
| Met dependence criteria                                                      | 51                                            | 18.9 | 28                                      | 25   |
| Number of prior hospitalizations                                             |                                               |      |                                         |      |
| 0                                                                            | 66                                            | 24.6 | 18                                      | 16.1 |
| 1                                                                            | 128                                           | 47.8 | 44                                      | 39.3 |
| 2                                                                            | 43                                            | 16   | 24                                      | 21.4 |
| 3 or more                                                                    | 31                                            | 11.6 | 6                                       | 23.2 |
| Prescribed one or more antipsychotics at consent                             | 224                                           | 83   | 96                                      | 85.7 |
| Medication compliance by SURF interview                                      |                                               |      |                                         |      |
| Days not taking first antipsychotic among those<br>prescribed antipsychotics |                                               |      |                                         |      |
| Few if any, <7                                                               | 179                                           | 83.3 | 78                                      | 86.7 |
| 7 to 13                                                                      | 14                                            | 6.5  | 4                                       | 4.4  |
| 14 to 20                                                                     | 9                                             | 4.2  | 4                                       | 4.4  |
| Most, >20                                                                    | 13                                            | 6.1  | 4                                       | 4.4  |

|                                                                                           | Never hospitalized During<br>Follow-up, N=270 |        | Hospitalized During<br>Follow-up, N=112 |        |
|-------------------------------------------------------------------------------------------|-----------------------------------------------|--------|-----------------------------------------|--------|
|                                                                                           |                                               |        |                                         |        |
| Days taking less than prescribed number of pills<br>among those prescribed antipsychotics |                                               |        |                                         |        |
| Always/almost always, 76 to 100%                                                          | 16                                            | 7.4    | 5                                       | 5.6    |
| Usually, 51 to 75%                                                                        | 5                                             | 2.3    | 2                                       | 2.2    |
| Sometimes, 26 to 50%                                                                      | 14                                            | 6.5    | 6                                       | 6.7    |
| Never or almost never, 0 to 25%                                                           | 180                                           | 83.7   | 77                                      | 85.6   |
| Days not taking first antipsychotic                                                       |                                               |        |                                         |        |
| Few if any, <7                                                                            | 179                                           | 66.5   | 78                                      | 70.3   |
| 7 to 13                                                                                   | 14                                            | 5.2    | 4                                       | 3.6    |
| 14 to 20                                                                                  | 9                                             | 3.4    | 4                                       | 3.6    |
| Most, >20                                                                                 | 13                                            | 4.8    | 4                                       | 3.6    |
| Not prescribed antipsychotic                                                              | 54                                            | 20.1   | 21                                      | 18.9   |
| Days taking less than prescribed number of pills                                          |                                               |        |                                         |        |
| Always/almost always, 76 to 100%                                                          | 16                                            | 6      | 5                                       | 4.5    |
| Usually, 51 to 75%                                                                        | 5                                             | 1.9    | 2                                       | 1.8    |
| Sometimes, 26 to 50%                                                                      | 14                                            | 5.2    | 6                                       | 5.4    |
| Never or almost never, 0 to 25%                                                           | 180                                           | 66.9   | 77                                      | 69.4   |
| Not prescribed antipsychotic                                                              | 54                                            | 20.1   | 21                                      | 18.9   |
| Adherence Estimator Risk Category                                                         |                                               |        |                                         |        |
| Low                                                                                       | 48                                            | 31.6   | 23                                      | 39     |
| Medium                                                                                    | 39                                            | 25.7   | 19                                      | 32.2   |
| High                                                                                      | 65                                            | 42.8   | 17                                      | 28.8   |
| Continuous Variables                                                                      | Mean                                          | SD     | Mean                                    | SD     |
| Age                                                                                       | 23.33                                         | 5.32   | 22.75                                   | 4.47   |
| Duration of untreated psychosis (weeks)                                                   | 182.35                                        | 260.49 | 225.18                                  | 268.69 |
| Heinrichs Carpenter Quality of Life Scale                                                 |                                               |        |                                         |        |
| Total score                                                                               | 53.95                                         | 19.17  | 50.71                                   | 17.94  |
| Interpersonal relations                                                                   | 20.26                                         | 8.85   | 19.40                                   | 8.38   |
| Instrumental role                                                                         | 6.03                                          | 6.66   | 4.66                                    | 6.31   |
| Intrapsychic foundations                                                                  | 21.10                                         | 7.03   | 20.26                                   | 6.83   |
| Common objects and activities                                                             | 6.56                                          | 2.31   | 6.39                                    | 2.32   |

|                                                                                                  | Never hospitalized During<br>Follow-up, N=270 |       | Hospitalized During<br>Follow-up, N=112 |       |
|--------------------------------------------------------------------------------------------------|-----------------------------------------------|-------|-----------------------------------------|-------|
|                                                                                                  |                                               |       |                                         |       |
| Positive and Negative Syndrome Scale                                                             |                                               |       |                                         |       |
| Total score                                                                                      | 75.66                                         | 15.16 | 78.43                                   | 14.64 |
| Wallwork Factor scores                                                                           |                                               |       |                                         |       |
| Positive                                                                                         | 11.86                                         | 3.78  | 13.17                                   | 3.91  |
| Negative                                                                                         | 16.89                                         | 5.20  | 16.06                                   | 5.01  |
| Disorganized/concrete                                                                            | 7.87                                          | 2.85  | 7.57                                    | 2.62  |
| Excited                                                                                          | 6.56                                          | 2.53  | 7.17                                    | 2.99  |
| Depressed                                                                                        | 7.75                                          | 3.32  | 8.67                                    | 3.21  |
| Calgary Depression Scale for Schizophrenia                                                       | 4.32                                          | 4.08  | 5.30                                    | 4.57  |
| Clinical Global Impressions - Severity Scale                                                     | 3.97                                          | 0.83  | 4.23                                    | 0.78  |
| Autonomy support scale mean score                                                                | 5.50                                          | 1.25  | 5.61                                    | 1.14  |
| Brief Evaluation of Medication Influences and Beliefs mean score                                 | 4.97                                          | 1.05  | 4.87                                    | 0.96  |
| Mental Health Recovery Measure mean score                                                        | 4.97                                          | 1.23  | 4.73                                    | 1.26  |
| Stigma Scale mean score                                                                          | 3.97                                          | 1.17  | 4.04                                    | 1.16  |
| Well Being Scale mean score                                                                      | 4.02                                          | 0.80  | 3.87                                    | 0.80  |
| Current State of Mental Health (1=worst possible emotional health; 100=perfect emotional health) | 63.52                                         | 23.58 | 58.20                                   | 23.52 |
| Life as a Whole (1=Terrible; 7=Delighted)                                                        | 4.40                                          | 1.43  | 4.28                                    | 1.45  |
| Number of days of alcohol intoxication past month                                                | 0.56                                          | 2.68  | 0.44                                    | 1.48  |
| Number of days of illegal drugs past month                                                       | 3.06                                          | 7.41  | 3.22                                    | 7.35  |
| Duration of lifetime anti-psychotic medication at consent (days)                                 | 44.83                                         | 47.71 | 43.79                                   | 44.13 |
| How likely to complete study (0=not at all; 9=extremely)                                         | 7.42                                          | 1.82  | 7.63                                    | 1.63  |
| How likely to attend next visit (0=not at all; 9=extremely)                                      | 7.93                                          | 1.67  | 8.19                                    | 1.33  |
| Adherence Estimator Risk Numeric Ordinal (0=low,1=med,2=high)                                    | 1.06                                          | 0.76  | 1.07                                    | 0.85  |
